# Supplementary material for: Approach to using 3D laser-induced breakdown spectroscopy (LIBS) data to explore the interaction of FLiNaK and FLiBe molten salts with nuclear-grade graphite
Source: Royal Society of Chemistry journal article supplement (doi:10.1039/d2ja00168c), 2022-01-01
Supplement: d2ja00168c1.pdf [file d2ja00168c1.pdf]

## Supporting Information:

### ***Approach to Using 3D Laser-Induced Breakdown Spectroscopy (LIBS) Data to Explore the Interaction of FLiNaK and FLiBe Molten Salts with Nuclear-Grade Graphite***

*Kristian G. Myhre,\* Hunter B. Andrews,\* Dino Sulejmanovic, Cristian I. Contescu, James R. Keiser, and Nidia C. Gallego*

#### Supporting Information Figures

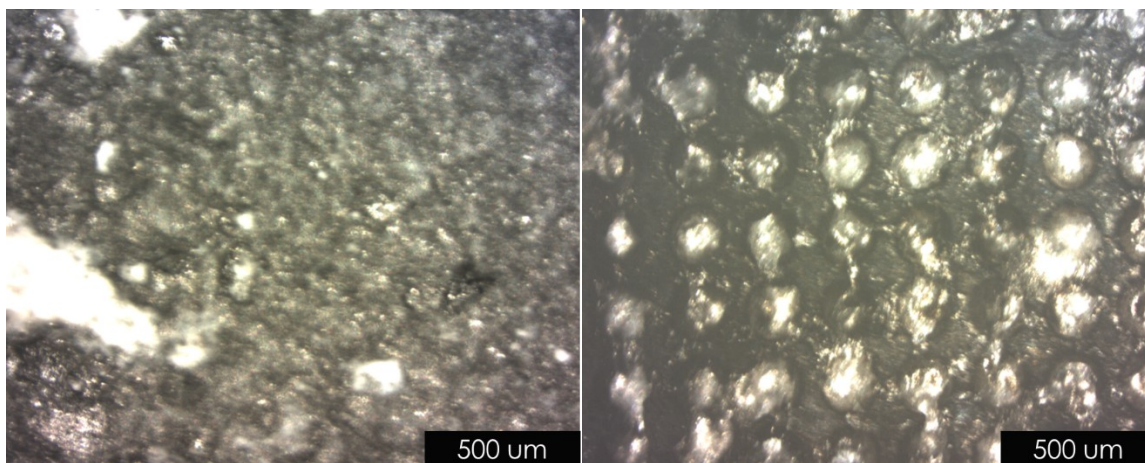

Figure S1: Images of a single area on a graphite sample exposed to FLiNaK before (*left*) and after (*right*) a  $10 \times 10$  LIBS mapping measurement with 200 shots per spot. The center-to-center distance of each sample was  $250 \mu\text{m}$ . The laser spot size was  $200 \mu\text{m}$  in diameter. Note: The final sampling procedure used on 50 shots per spot.

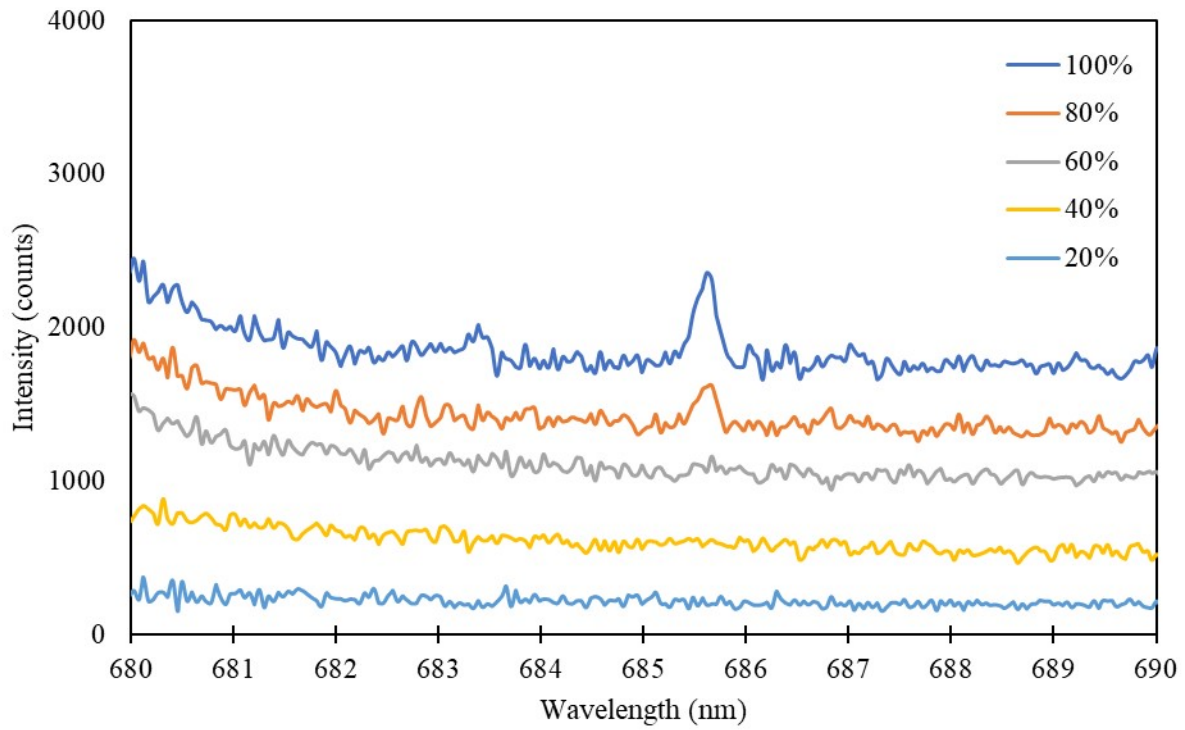

Figure S2: Optical emission spectra from 680 to 690 nm of a graphite sample exposed to molten FLiNaK at various energies (100%, 80%, 60%, 40%, and 20% of the maximum 16.4 mJ) performed with a delay time of 0.25  $\mu$ s.

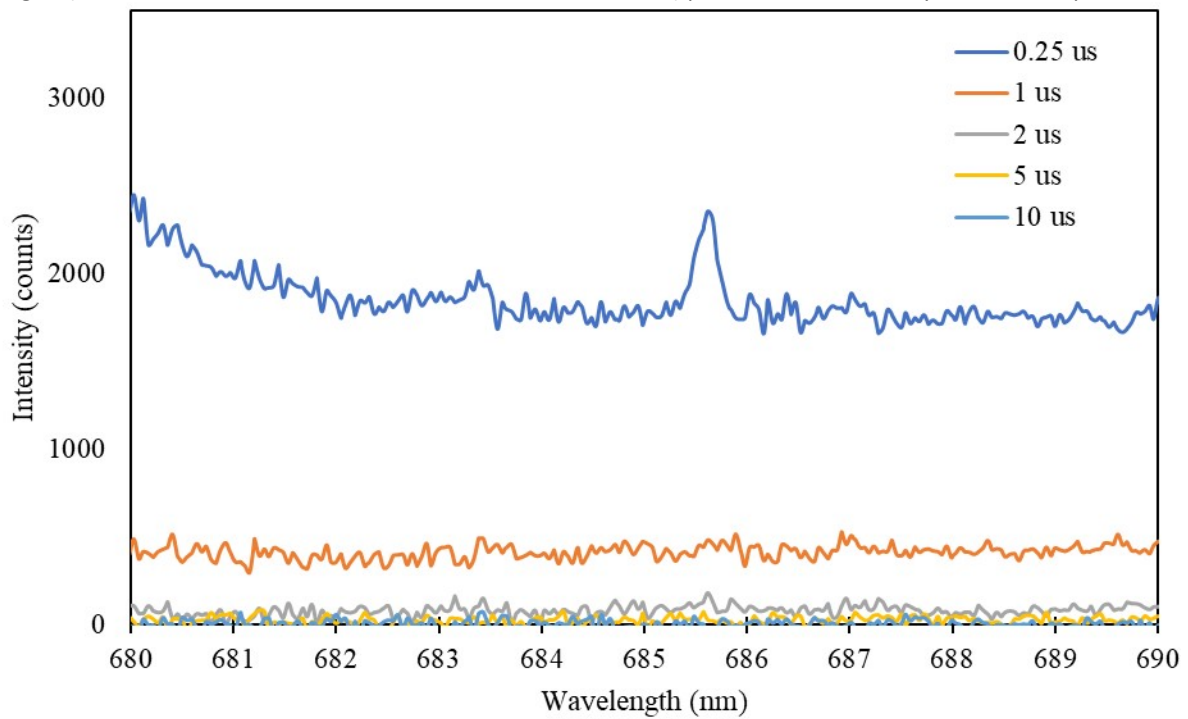

Figure S3: Optical emission spectra from 680 to 690 nm of a graphite sample exposed to molten FLiNaK at various delay times (0.25, 1, 2, 5, and 10  $\mu$ s) performed at 100% laser pulse energy.

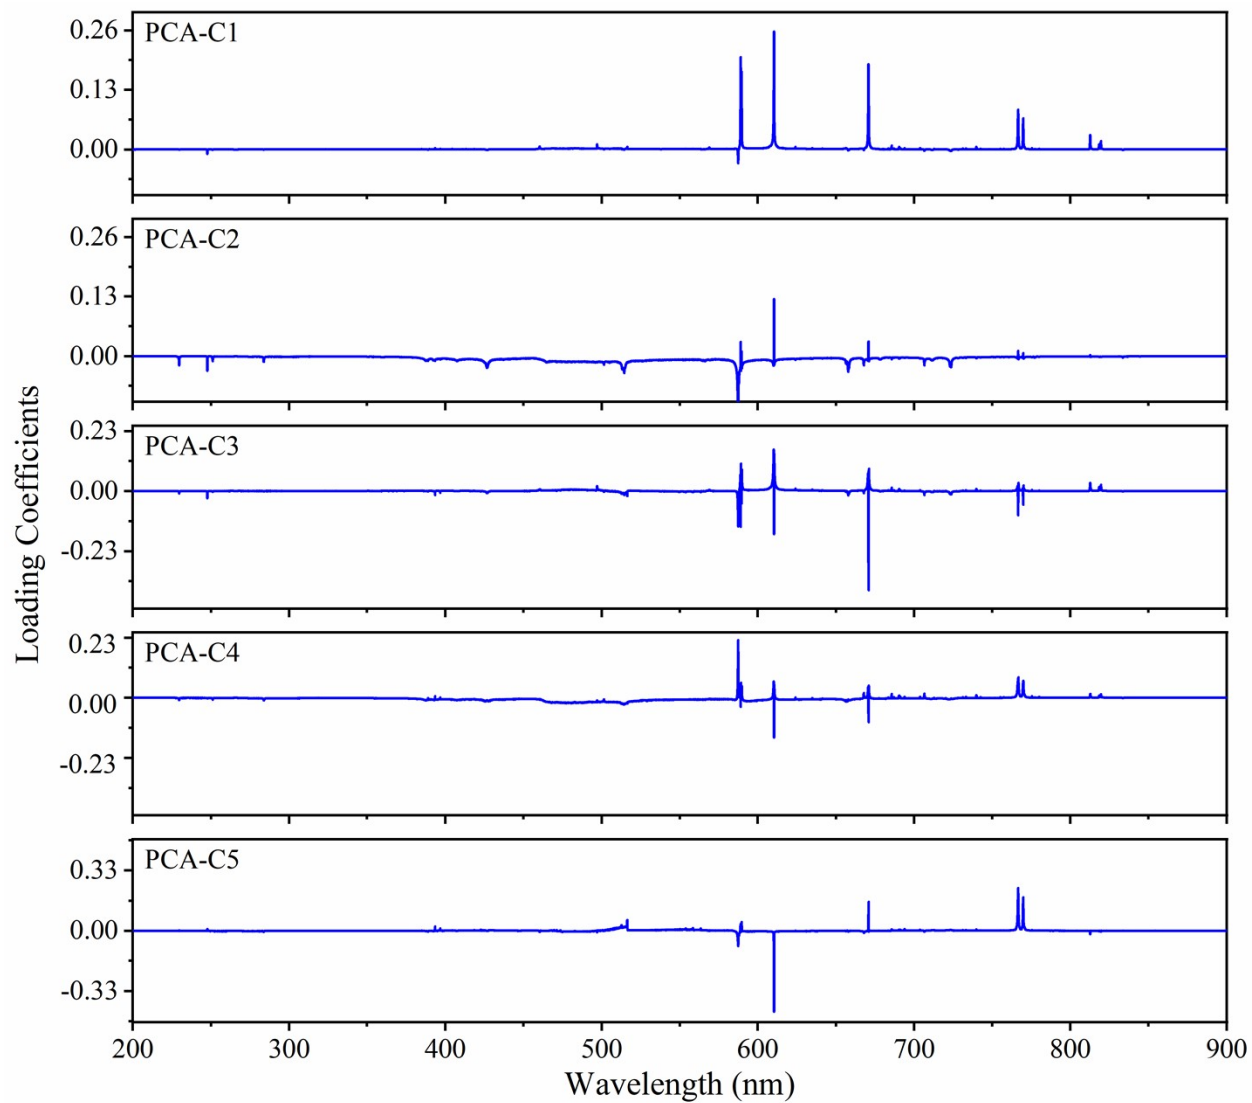

Figure S4. Loading plots of the first five components for PCA-based data segmentation for Sample K1.

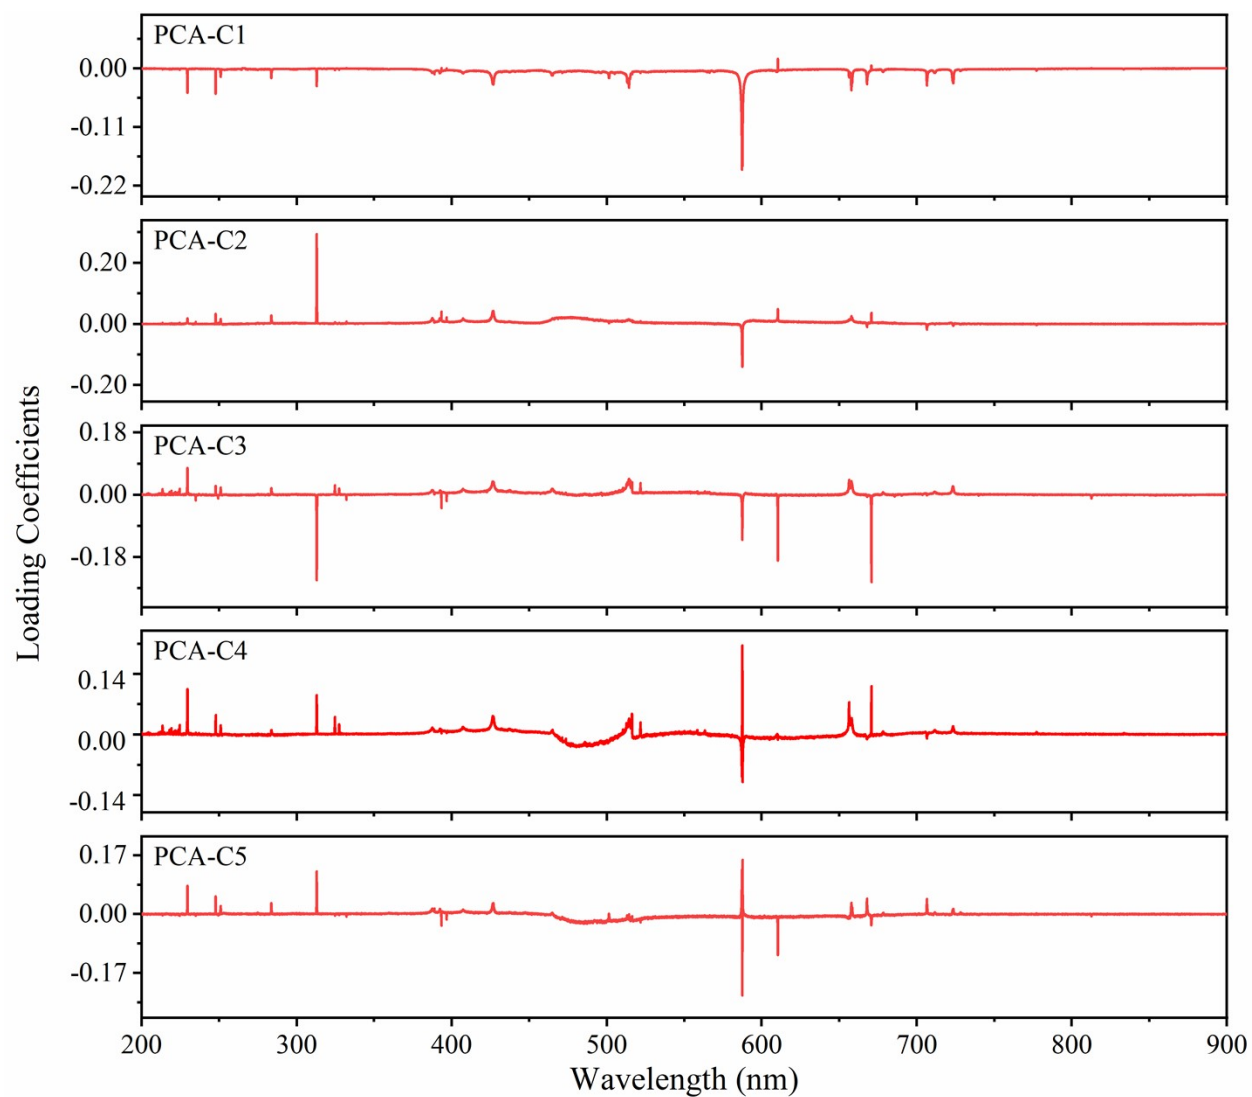

Figure S5. Loading plots of the first five components for PCA-based data segmentation for Sample B1.

## Supporting Information Tables

Table S1: Correlation analysis between the 3D distributions of elements in Sample K1.

|                     | H I   | He I  | Li I  | C I   | O I   | F I   | Na I  | K I   | C II  | C <sub>2</sub> Swan |
|---------------------|-------|-------|-------|-------|-------|-------|-------|-------|-------|---------------------|
| H I                 | 1.00  | 0.09  | 0.10  | -0.05 | 0.56  | 0.19  | 0.12  | 0.22  | 0.12  | -0.14               |
| He I                | 0.09  | 1.00  | -0.48 | 0.48  | 0.22  | -0.29 | -0.51 | -0.46 | 0.19  | -0.14               |
| Li I                | 0.10  | -0.48 | 1.00  | -0.48 | 0.06  | 0.64  | 0.95  | 0.87  | -0.16 | 0.17                |
| C I                 | -0.05 | 0.48  | -0.48 | 1.00  | -0.04 | -0.40 | -0.41 | -0.37 | 0.66  | 0.15                |
| O I                 | 0.56  | 0.22  | 0.06  | -0.04 | 1.00  | 0.11  | 0.03  | 0.09  | 0.08  | -0.25               |
| F I                 | 0.19  | -0.29 | 0.64  | -0.40 | 0.11  | 1.00  | 0.56  | 0.70  | -0.12 | -0.03               |
| Na I                | 0.12  | -0.51 | 0.95  | -0.41 | 0.03  | 0.56  | 1.00  | 0.88  | -0.15 | 0.32                |
| K I                 | 0.22  | -0.46 | 0.87  | -0.37 | 0.09  | 0.70  | 0.88  | 1.00  | -0.07 | 0.35                |
| C II                | 0.12  | 0.19  | -0.16 | 0.66  | 0.08  | -0.12 | -0.15 | -0.07 | 1.00  | 0.09                |
| C <sub>2</sub> Swan | -0.14 | -0.14 | 0.17  | 0.15  | -0.25 | -0.03 | 0.32  | 0.35  | 0.09  | 1.00                |

Table S2: Correlation analysis between the 3D distributions of elements in Sample B1.

|                     | H I   | He I  | Li I  | C I   | O I   | F I   | Be II | C II  | C <sub>2</sub> Swan |
|---------------------|-------|-------|-------|-------|-------|-------|-------|-------|---------------------|
| H I                 | 1.00  | 0.30  | -0.25 | 0.35  | 0.53  | -0.26 | -0.30 | 0.54  | 0.70                |
| He I                | 0.30  | 1.00  | -0.22 | 0.23  | 0.57  | -0.08 | -0.33 | 0.55  | 0.05                |
| Li I                | -0.25 | -0.22 | 1.00  | -0.29 | -0.04 | 0.82  | 0.57  | -0.31 | -0.20               |
| C I                 | 0.35  | 0.23  | -0.29 | 1.00  | 0.01  | -0.20 | -0.06 | 0.74  | 0.46                |
| O I                 | 0.53  | 0.57  | -0.04 | 0.01  | 1.00  | -0.01 | -0.08 | 0.19  | 0.02                |
| F I                 | -0.26 | -0.08 | 0.82  | -0.20 | -0.01 | 1.00  | 0.61  | -0.16 | -0.32               |
| Be II               | -0.30 | -0.33 | 0.57  | -0.06 | -0.08 | 0.61  | 1.00  | -0.21 | -0.35               |
| C II                | 0.54  | 0.55  | -0.31 | 0.74  | 0.19  | -0.16 | -0.21 | 1.00  | 0.57                |
| C <sub>2</sub> Swan | 0.70  | 0.05  | -0.20 | 0.46  | 0.02  | -0.32 | -0.35 | 0.57  | 1.00                |
